# Supplementary material
Source: publisher figshare collection journal article supplement (https://acs.figshare.com/ndownloader/files/4190476)
Supplement: Supplementary file 1 [file 4190476]

Supporting Information for

## **Effects of Side-Chain Interdigitation on Stability: An Environmentally, Electrically, and Thermally Stable Semiconducting Polymer**

**Danbi Choi <sup>(a)</sup>, Ban-Seok Jeong <sup>(b)</sup>, Byungcheol Ahn <sup>(c)</sup>, Dae Sung Chung <sup>(a)</sup>, Ki-Min Lim <sup>(b)</sup>, Se Hyun Kim <sup>(a)</sup>, Seon Uk Park <sup>(a)</sup>, Moonhor Ree <sup>(c)\*</sup>, Jaejung Ko <sup>(b)\*</sup>, Chan Eon Park <sup>(a)\*</sup>**

*(a) Polymer Research Institute, Department of Chemical Engineering, Pohang University of Science and Technology, Pohang, 790-784, Korea;*

*(b) Department of New Materials Chemistry, Korea University, Jochiwon, Chungnam 339-700 (Korea);*

*(c) Department of Chemistry, Division of Advanced Materials Science, Center for Electro-Photo Behaviors in Advanced Molecular Systems, Pohang Accelerator Laboratory, Polymer Research Institute, and BK School of Molecular Science, Pohang University of Science and Technology, Pohang, 790-794, Korea*

---

\* To whom all correspondence should be addressed.

Tel: +82-54-279-2269 (CEP), +82-41-860-1337 (JK), +82-54-279-2120 (MR)

Fax: +82-54-279-8298 (CEP), +82-41-867-5396 (JK), +82-54-279-3399 (MR)

E-mail: cep@postech.edu (CEP), jko@korea.ac.kr (JK), ree@postech.edu (MR)

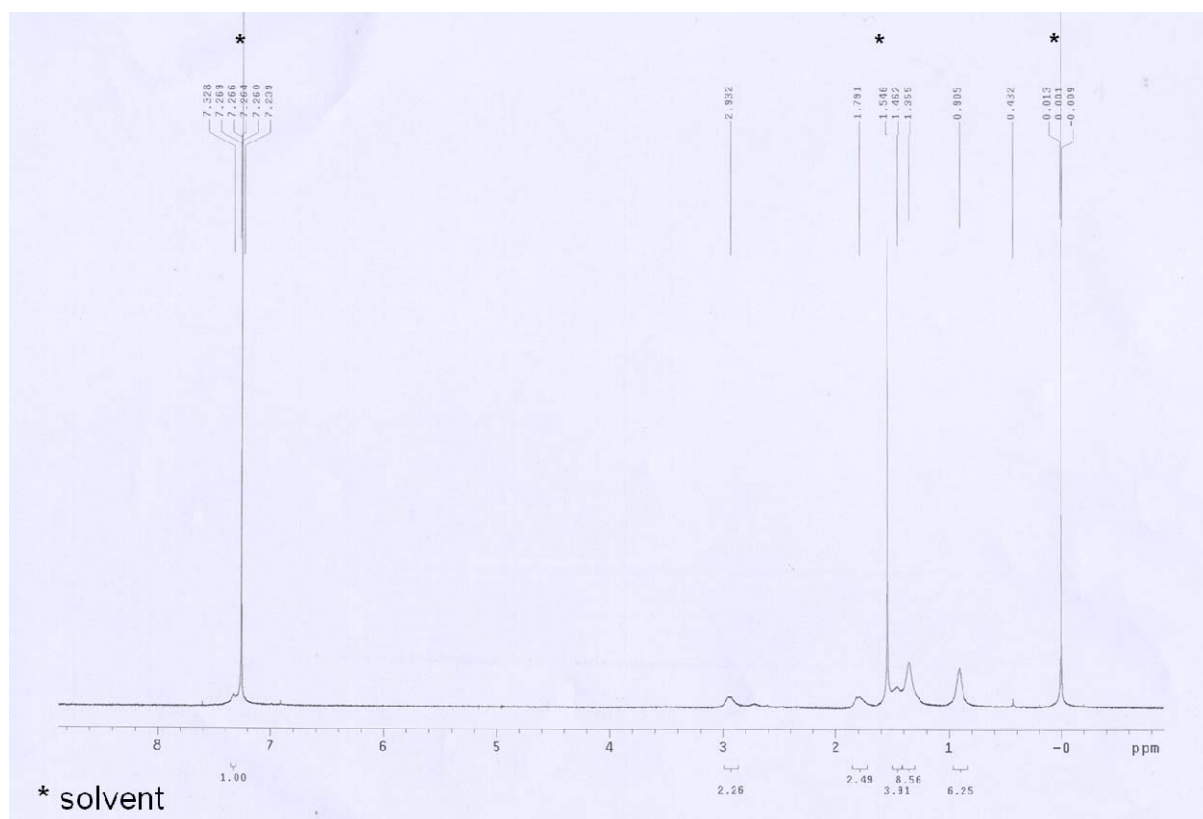

**Figure S1.**  $^1\text{H}$  NMR spectrum of the PDHTT

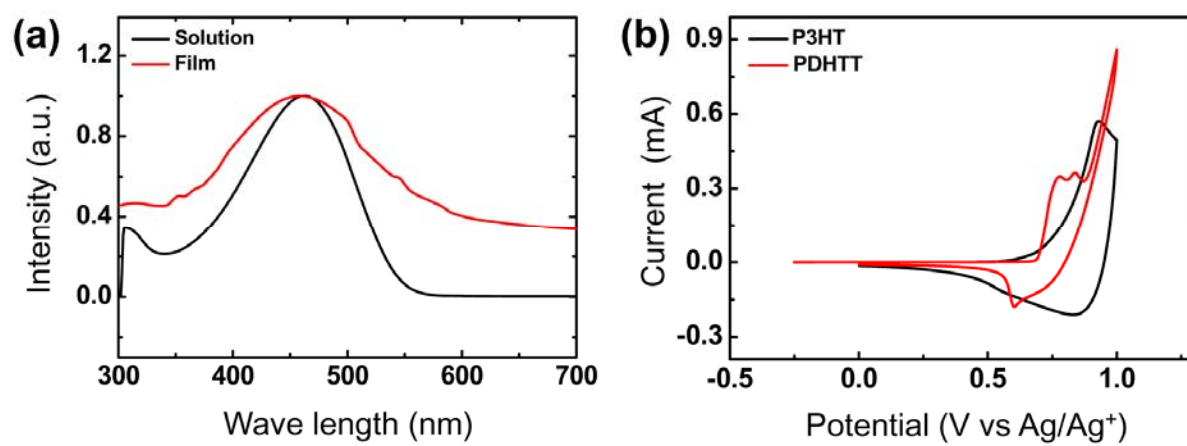

**Figure S2.** (a) UV-Vis absorption spectra and (b) cyclic voltammetry (vs Ag/AgCl) of the PDHTT film.

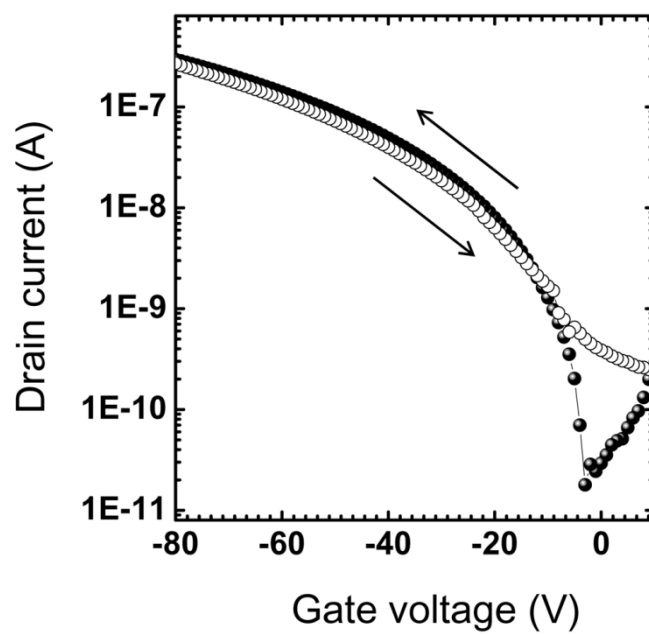

**Figure S3.**  $I_D$ - $V_G$  transfer characteristics of PDHTT-based OTFTs in the saturation regime ( $V_D = -80$  V).

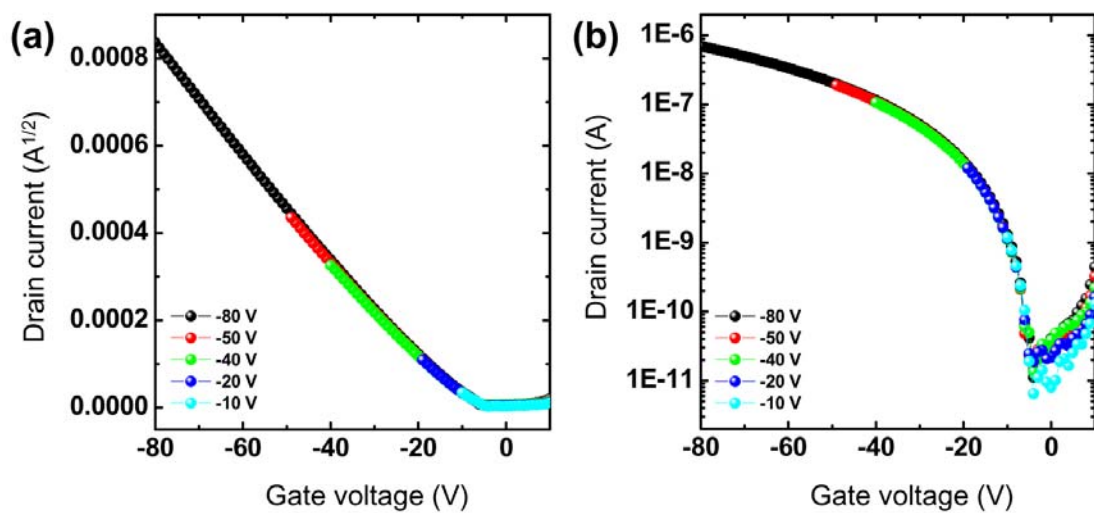

**Figure S4.** (a)  $I_D^{1/2}$ - $V_G$ , (b)  $I_D$ - $V_G$  transfer characteristics of the PDHTT OTFTs at various gate voltages.

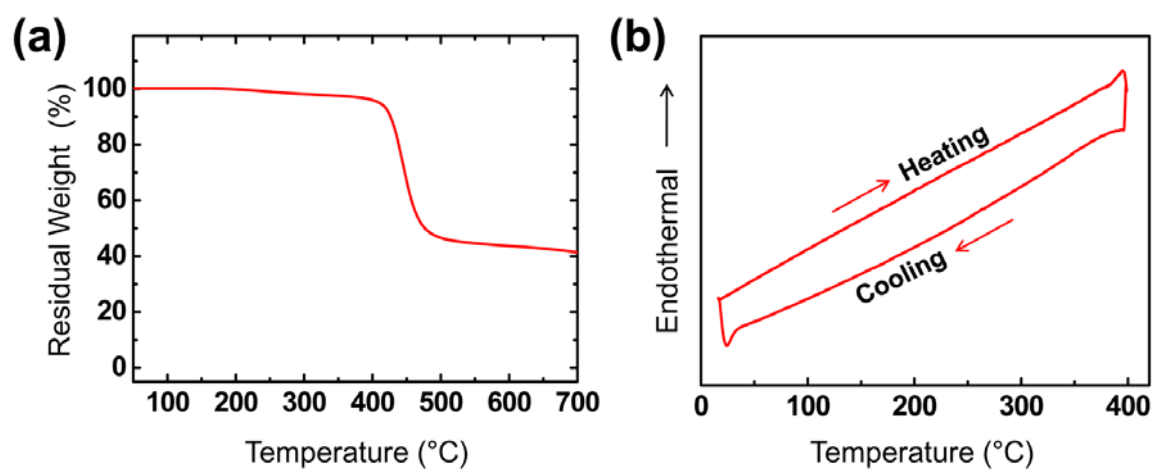

**Figure S5.** (a) TGA and (b) DSC analyses of PDHTT film.
